# Supplementary material for: Cardiac cobaltism: a rare complication after bilateral metal-on-metal total hip arthroplasty
Source: PubMed Central journal article supplement — Arthroplast Today. 2015 Nov 21;1(4):99–102. doi: 10.1016/j.artd.2015.10.002 (PMC4958119; doi:10.1016/j.artd.2015.10.002), 2015-11-21
Supplement: mmc2.pdf [file mmc2.pdf]

# CONFLICT OF INTEREST STATEMENT

## *Arthroplasty Today*

(Adopted from the American Academy of Orthopaedic Surgeons disclosure statement)

The following form **must be filled out completely and submitted by each author (example, 6 authors, 6 forms). If no discloser is required, please write/type "none" at the end of each sentence.**

Manuscript Title: *Cardiac Cobaltism: A rare complication after Bilateral Metal on Metal THA*

- 1. Royalties from a company or supplier (The following conflicts were disclosed) **None**
- 2. Speakers bureau/paid presentations for a company or supplier (The following conflicts were disclosed) **None**
- 3A. Paid employee for a company or supplier (The following conflicts were disclosed) **None**
- 3B. Paid consultant for a company or supplier (The following conflicts were disclosed) **None**
- 3C. Unpaid consultants for a company or supplier (The following conflicts were disclosed) **None**
- 4. Stock or stock options in a company or supplier (The following conflicts were disclosed) **None**
- 5. Research support from a company or supplier as a Principal Investigator (The following conflicts were disclosed)  
**None**
- 6. Other financial or material support from a company or supplier (The following conflicts were disclosed) **None**
- 7. Royalties, financial or material support from publishers (The following conflicts were disclosed) **None**
- 8. Medical/Orthopaedic publications editorial/governing board (The following conflicts were disclosed) **None**
- 9. Board member/committee appointments for a society (The following conflicts were disclosed) **None**

**Each author must sign AND print or type his/her name, date and submit a separate form**

In addition, one BLINDED Conflict of Interest form (no author names used) should be submitted per manuscript with all author disclosures.

Christopher L. Camp

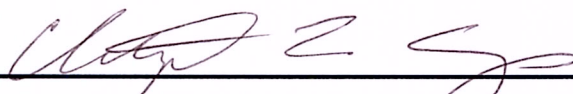

6/5/15
